# Supplementary material
Source: publisher figshare collection journal article supplement (https://acs.figshare.com/ndownloader/files/3899395)
Supplement: Supplementary file 1 [file 3899395]

For Table of Contents Only

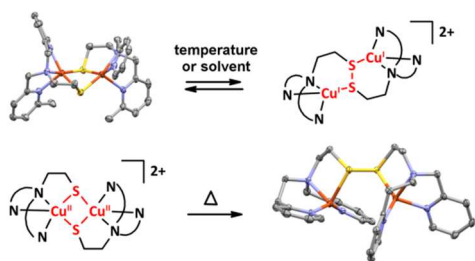

The redox equilibrium between dinuclear  $\text{Cu}^{\text{II}}$   $\mu$ -thiolate and  $\text{Cu}^{\text{I}}$  disulfide structures has been studied. It was found that the equilibrium between the two species can depend on both solvent and temperature, and that the  $\mu$ -thiolate complex forms under kinetic control, whereas the disulfide complex is the most stable species. The energies of the  $\mu$ -thiolate and disulfide complexes for two series of related ligands have been calculated with DFT; the results rationalize the experimentally observed structures.
